# Supplementary material
Source: publisher figshare collection journal article supplement (https://diabetesjournals.figshare.com/articles/dataset/_/13110335)

# Supplemental Figure 1

**A**

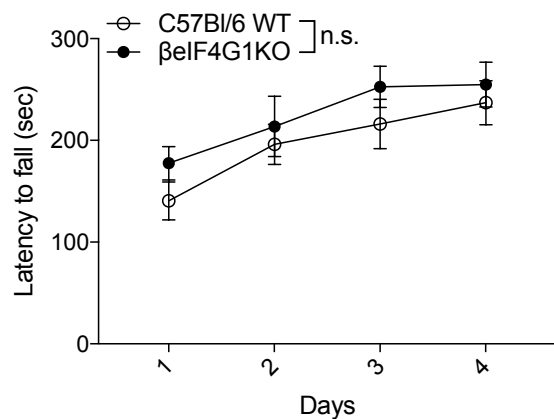

**B**

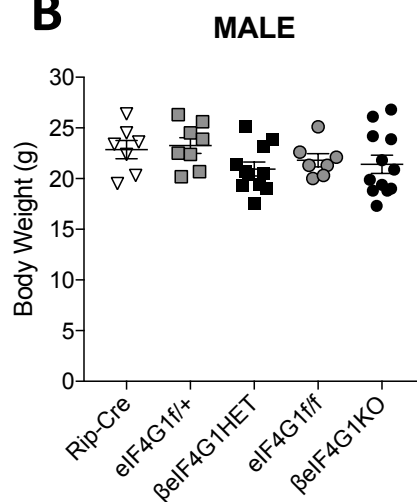

**C**

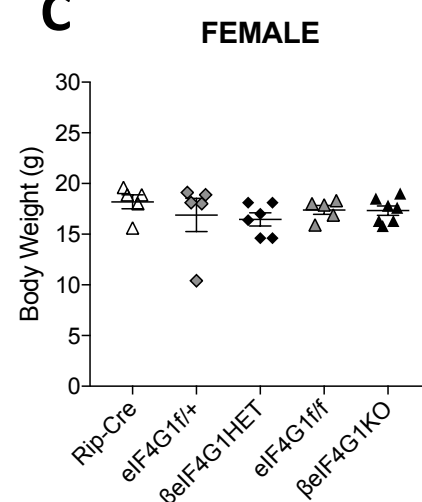

**D**

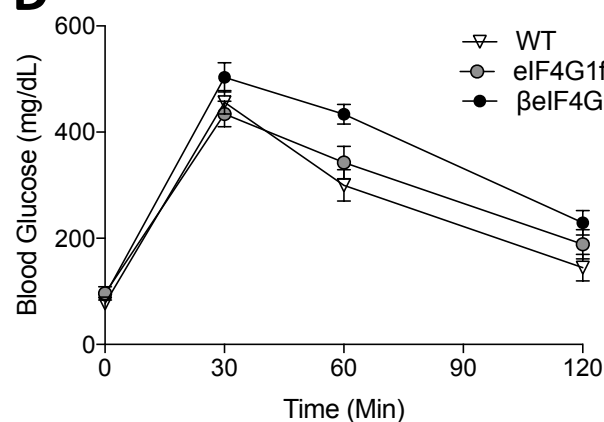

**E**

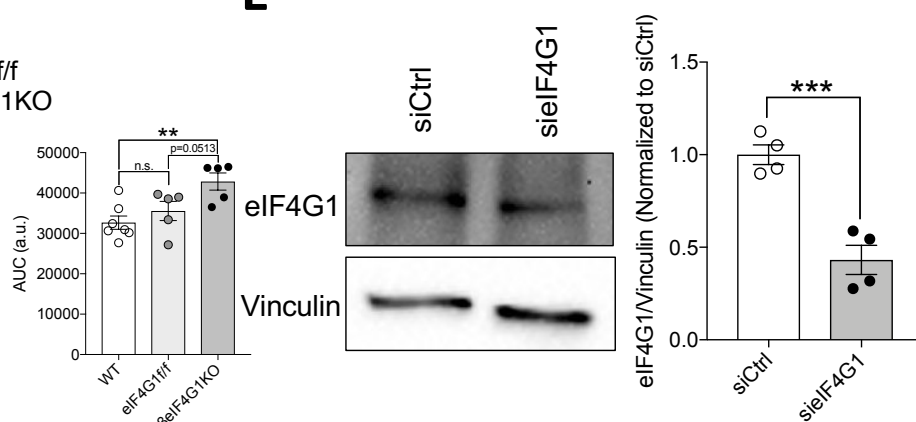

# Supplemental Figure 2

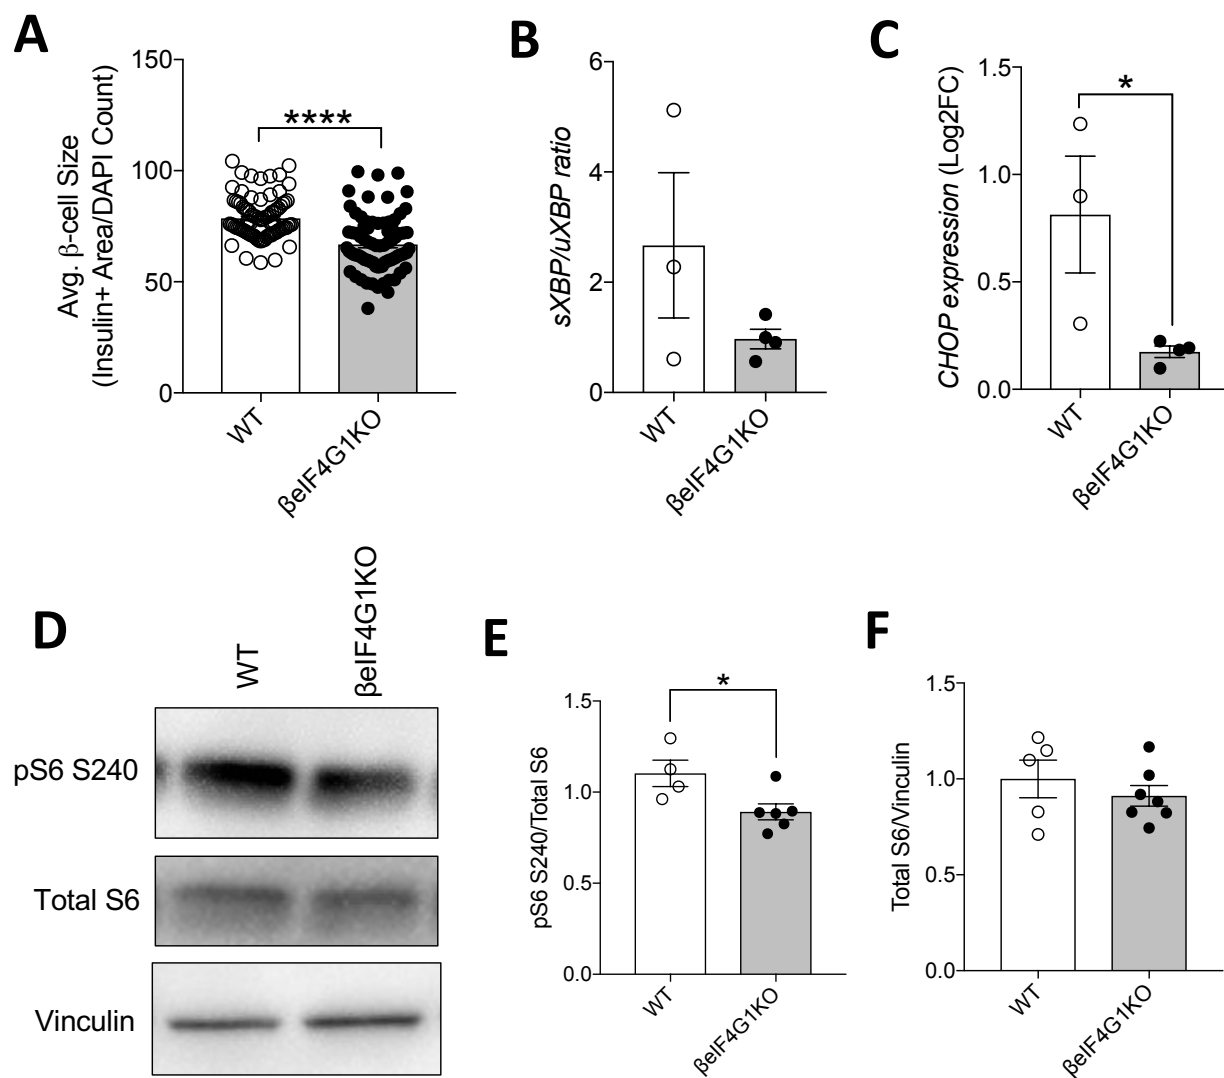

# Supplemental Figure 3

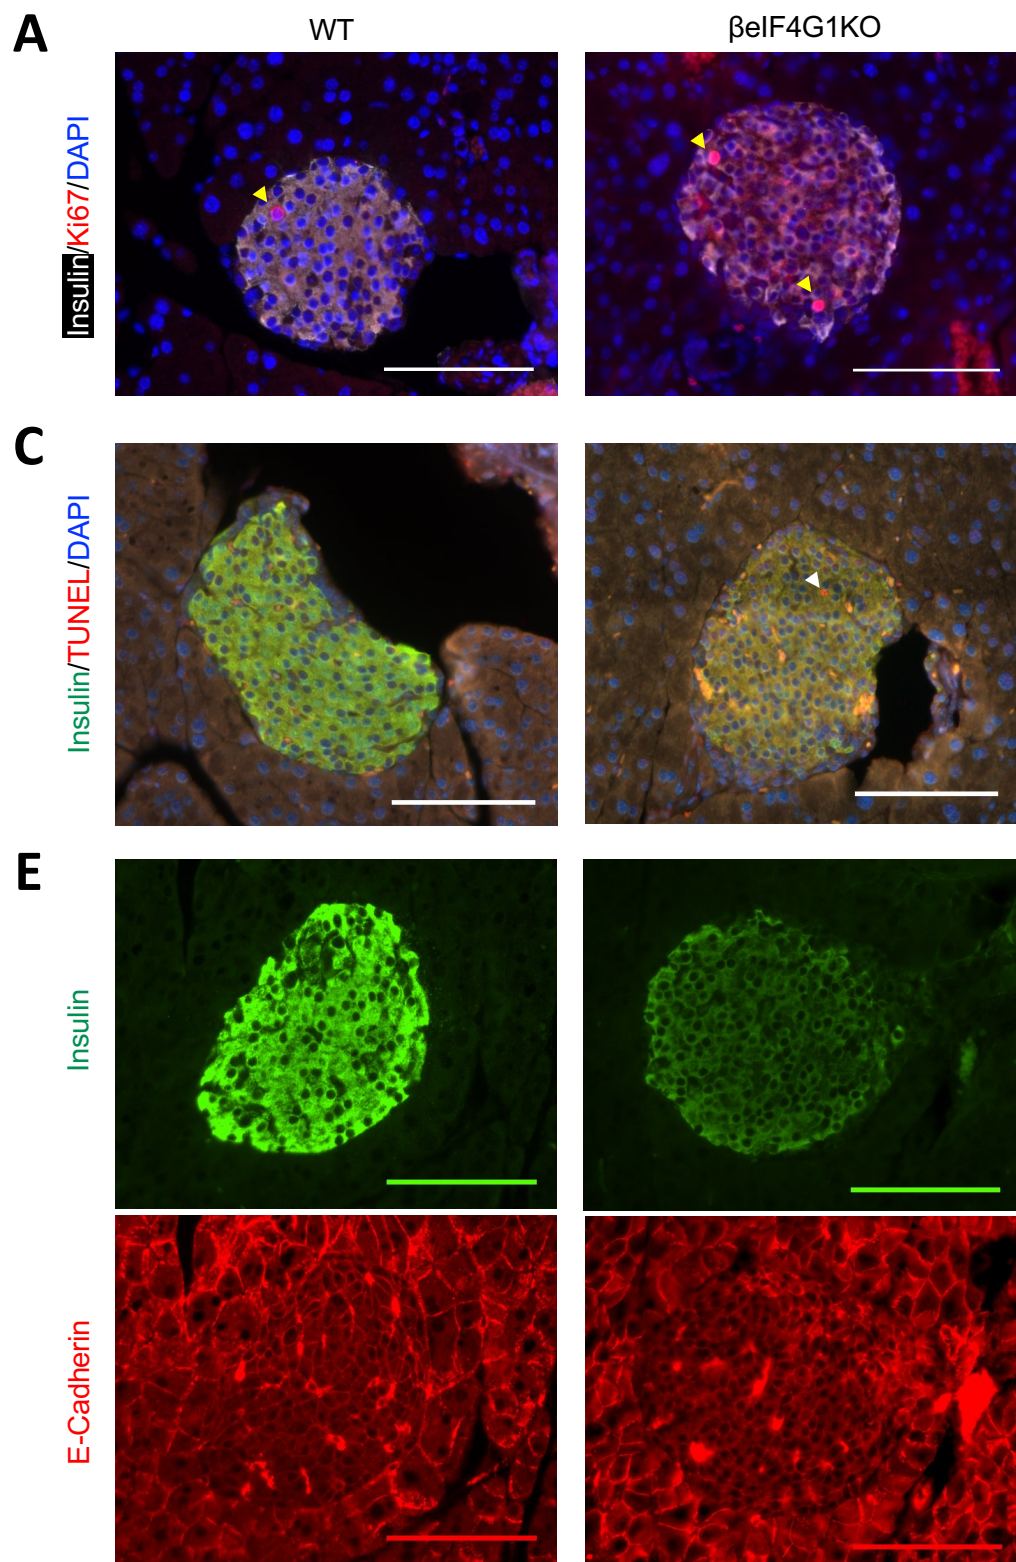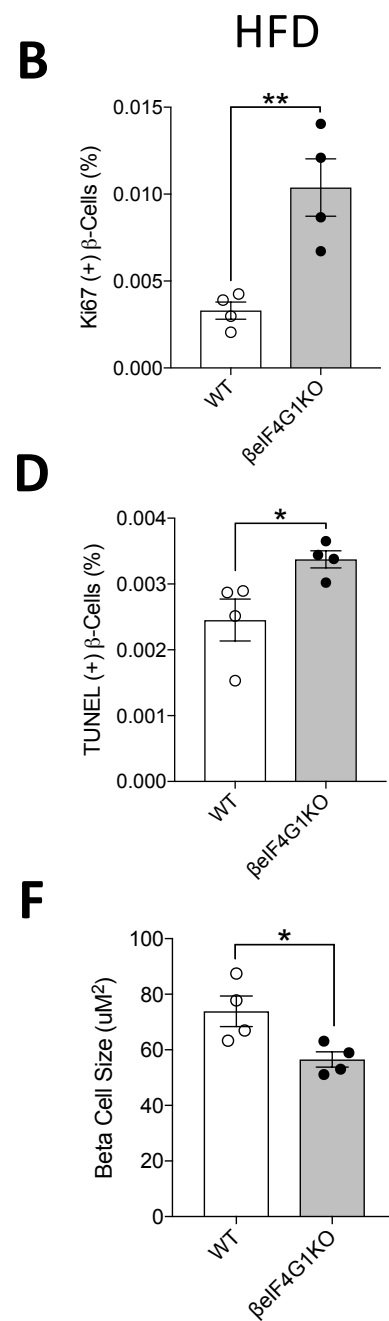

Supplemental Figure 4

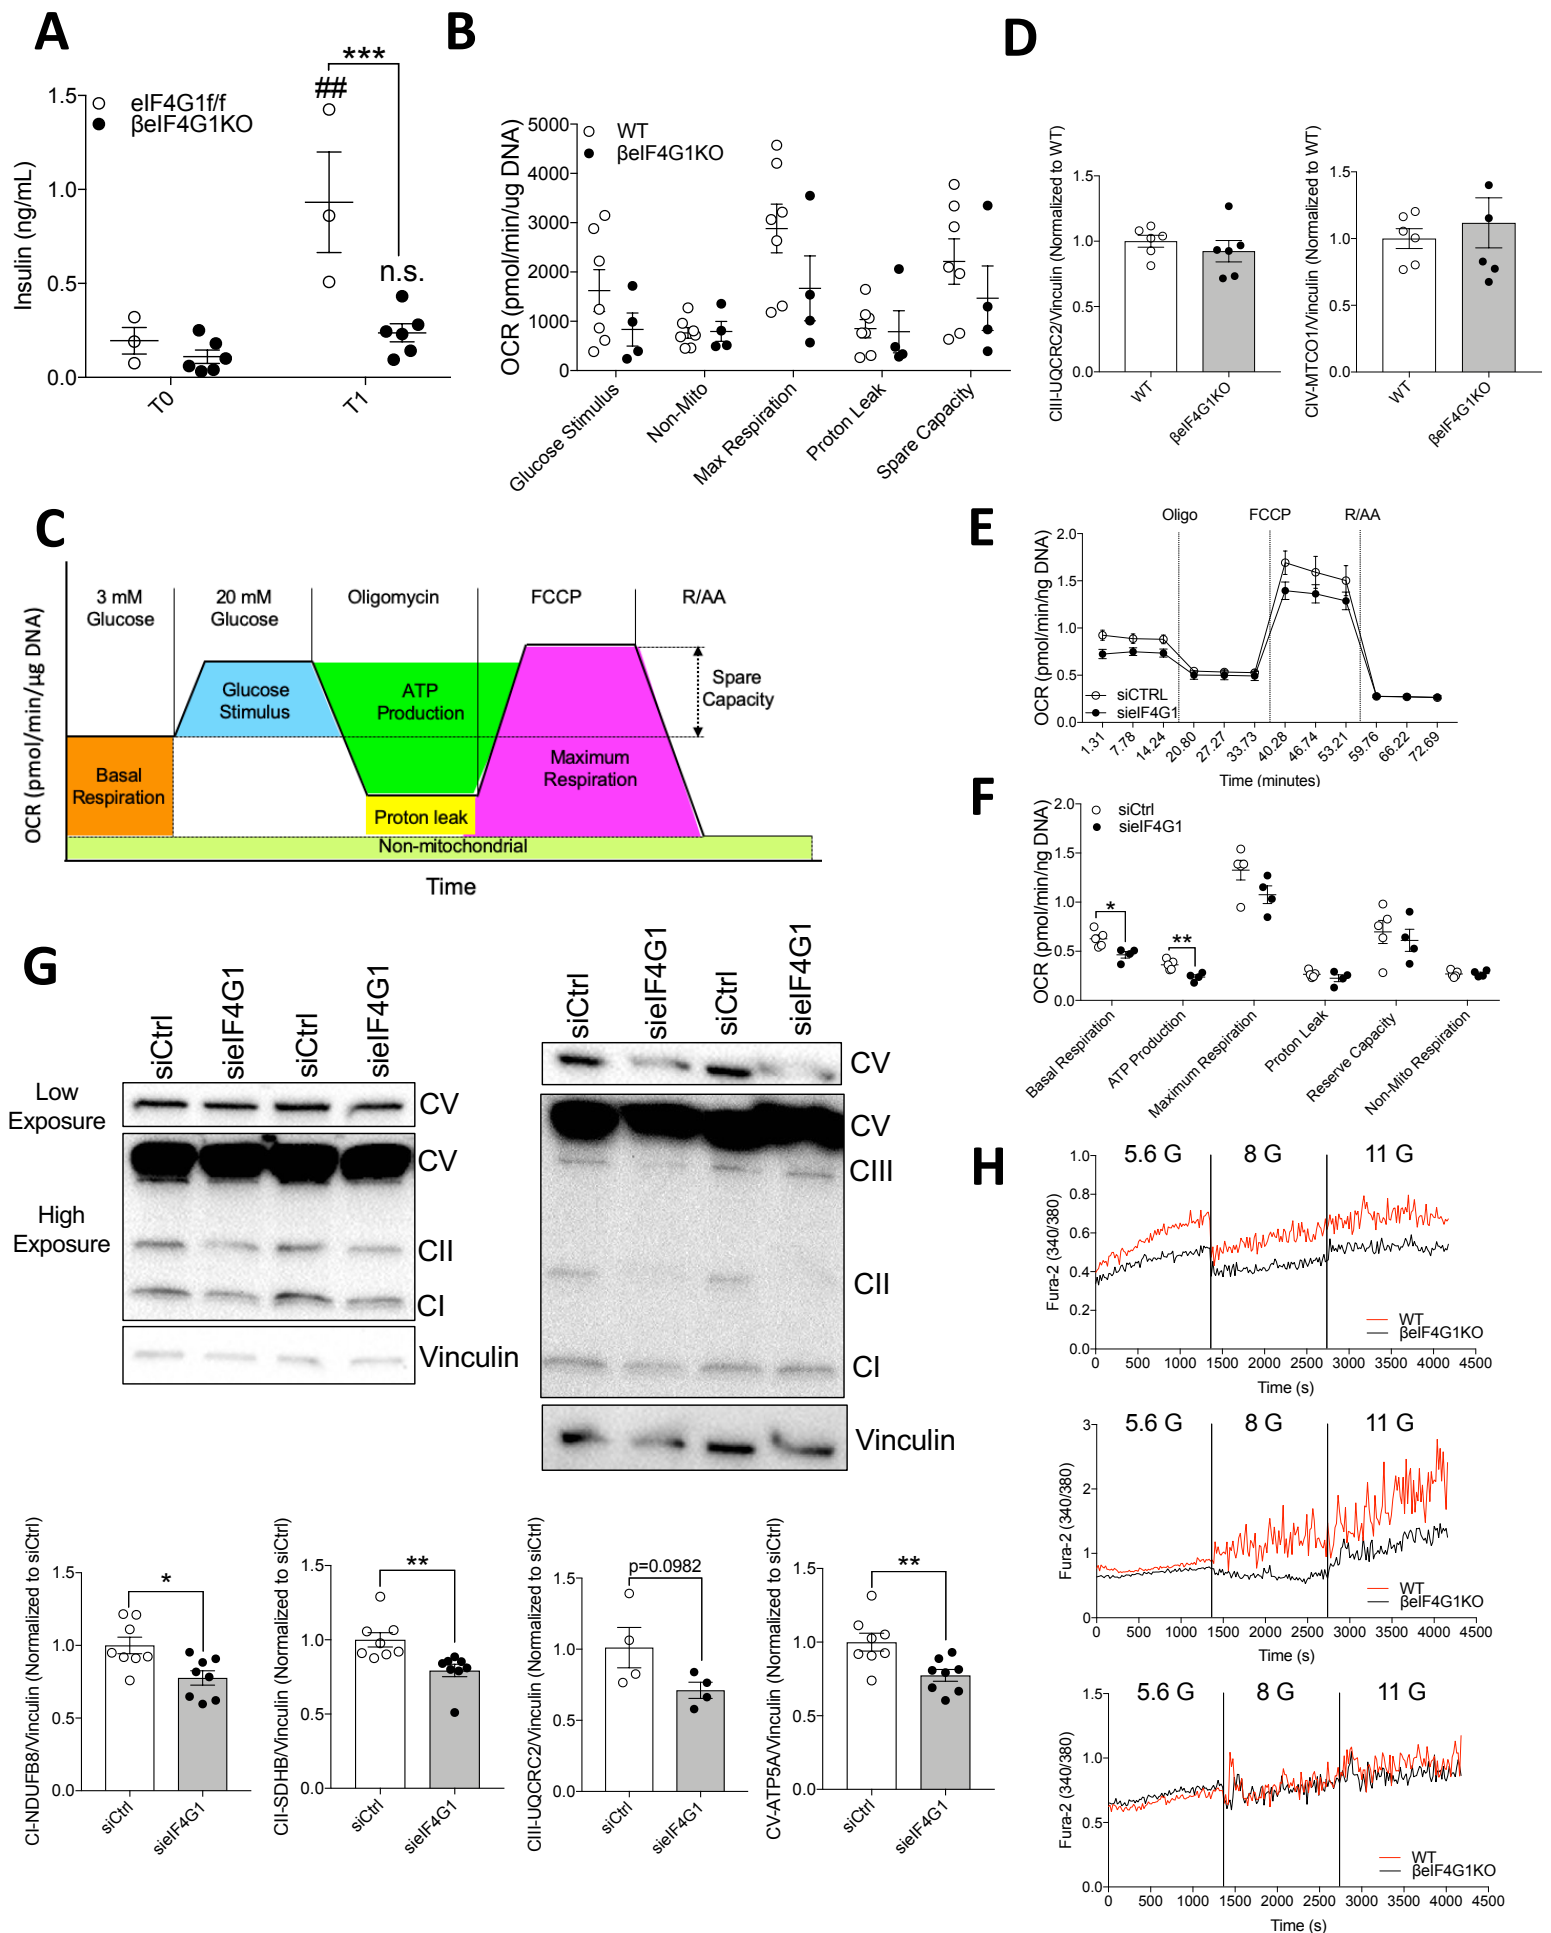

# Supplemental Figure 5

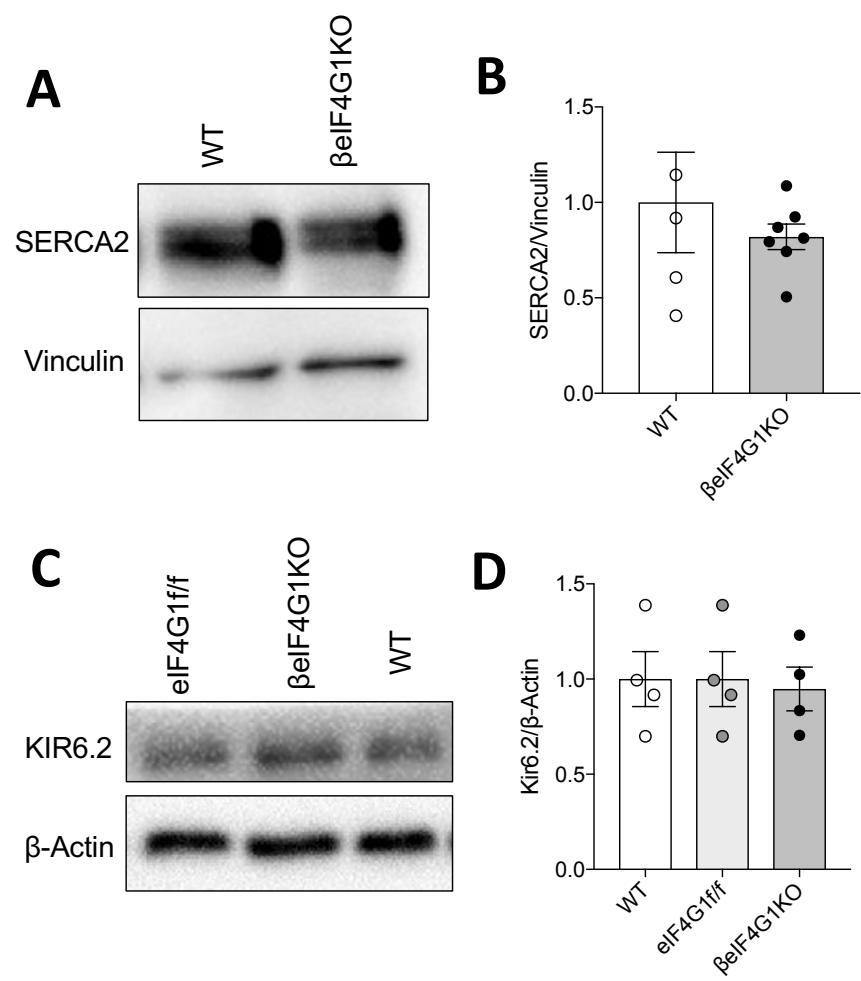

# Supplemental Figure 6

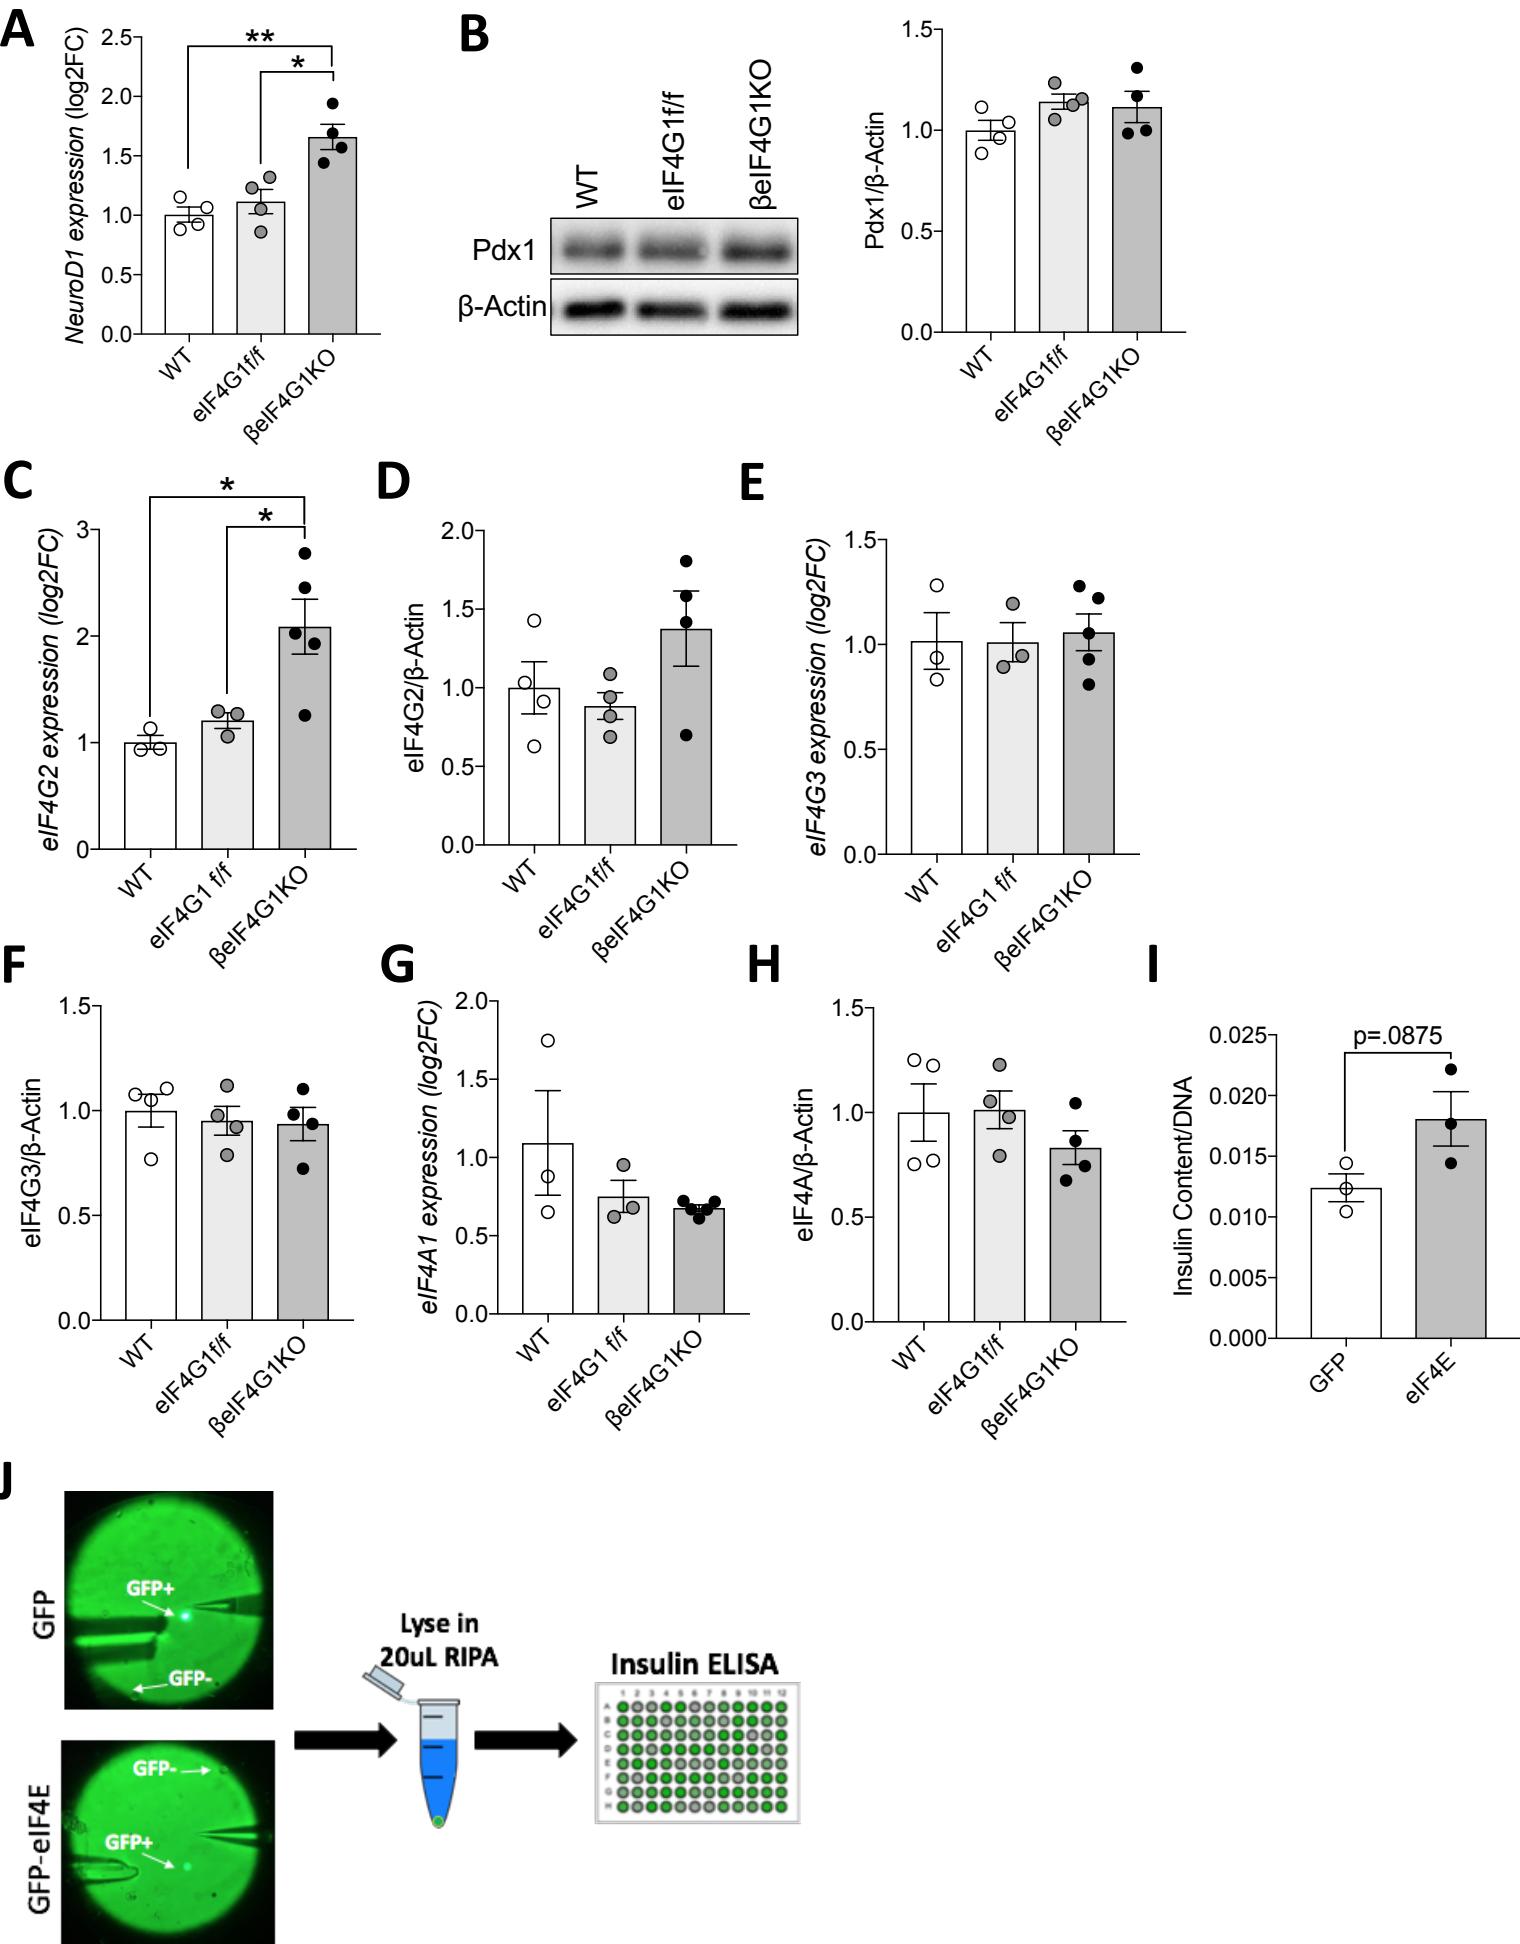

Supplement: Supplementary file 2 [file 1]
