# Supplementary material
Source: publisher figshare collection journal article supplement (https://diabetesjournals.figshare.com/articles/dataset/_/13110335)
Supplement: Supplementary file 3 [file 1]

**Supplemental Table 1.** List of antibodies used for immunofluorescence, immunoprecipitation and western blot analyses.

| <b>Primary Antibody</b> | <b>Dilution</b>                               | <b>Source</b>                                         |
|-------------------------|-----------------------------------------------|-------------------------------------------------------|
| CPE                     | 1:1000-2000 <sup>a</sup> ; 1:400 <sup>b</sup> | BD Transduction                                       |
| CPE                     | 3ug <sup>c</sup>                              | Proteintech                                           |
| Bip                     | 1:2000 <sup>a</sup>                           | Gift from Dr. Peter Arvan<br>(University of Michigan) |
| Beta-Catenin            | 1:100 <sup>b</sup>                            |                                                       |
| eIF4G1                  | 1:250-1000 <sup>a</sup>                       | Proteintech                                           |
| E-Cadherin              | 1:200 <sup>b</sup>                            | BD Transduction                                       |
| β-Actin                 | 1:1000-2000 <sup>a</sup>                      | Cell Signaling Technology                             |
| Vinculin                | 1:1000-2000 <sup>a</sup>                      | Cell Signaling Technology                             |
| Insulin                 | 1:400 <sup>b</sup>                            | DAKO                                                  |
| Ki67                    | 1:100 <sup>b</sup>                            | Abcam                                                 |
| BrdU                    | 1:100 <sup>b</sup>                            | Proteintech                                           |
| Pdx1                    | 1:1500 <sup>a</sup>                           | Millipore                                             |
| eIF4G2                  | 1:500 <sup>a</sup>                            | Santa Cruz                                            |
| eIF4G3                  | 1:500 <sup>a</sup>                            | Santa Cruz                                            |
| eIF4A1/II               | 1:500 <sup>a</sup>                            | Santa Cruz                                            |
| eIF4E                   | 1:500 <sup>a</sup>                            | Santa Cruz                                            |
| Phospho-S6 S240         | 1:1000 <sup>a</sup>                           | Cell Signaling                                        |
| Phospho-PERK Thr980     | 1:500 <sup>a</sup>                            | Cell Signaling                                        |
| Total S6                | 1:1000 <sup>a</sup>                           | Cell Signaling                                        |
| Total Oxphos            | 1:1000 <sup>a</sup>                           | Abcam                                                 |
| SERCA2                  | 1:500 <sup>a</sup>                            | Santa Cruz                                            |

|                                                                              |                           |                        |
|------------------------------------------------------------------------------|---------------------------|------------------------|
| KIR6.2                                                                       | 1:500 <sup>a</sup>        | Santa Cruz             |
| <b>Secondary Antibody</b>                                                    | <b>Dilution Factor</b>    | <b>Source</b>          |
| HRP conjugated Goat Anti-Rabbit<br>or Mouse IgG H&L or Streptavidin<br>(STV) | 1:5000-10000 <sup>a</sup> | GEHealthcare           |
| FITC AffiniPure Donkey IgG H&L                                               | 1:400 <sup>b</sup>        | Jackson Immunoresearch |
| Cy <sup>TM</sup> 3 AffiniPure Donkey IgG<br>H&L                              | 1:400 <sup>b</sup>        | Jackson Immunoresearch |

Dilution factor for <sup>a</sup>western blot, <sup>b</sup>immunofluorescence, <sup>c</sup>immunoprecipitation

**Supplemental Table 2.** List of primers and sequences used for qPCR analysis.

|                    | <b>Primer Sequence</b>                        |
|--------------------|-----------------------------------------------|
| Beta-Actin Forward | 5' – GCC CTG AGG CTC TTT TCC AG – 3'          |
| Beta-Actin Reverse | 5' – TGC CAC AGG ATT CCA TAC CC – 3'          |
| CPE Left           | 5' – GCT CAG GTA ATT GAA GTC TT – 3'          |
| CPE Right          | 5' – TAC TGC TCA CGA ATA CAG TT – 3'          |
| INS1 Left          | 5' – GCC ATG TTG AAA CAA TGA CCT – 3'         |
| INS1 Right         | 5' – CAG AGA GGA AGG TAC TTT GGA CTA TAA – 3' |
| INS2 Left          | 5' – GAA GTG GAG GAC CCA CAA GT – 3'          |
| INS2 Right         | 5' – AGT GCC AAG GTC TGA AGG TC – 3'          |
| NeuroD1 Forward    | 5' – CGC AGA AGG CAA GGT GTC – 3'             |
| NeuroD1 Reverse    | 5' - TTT GGT CAT GTT TCC ACT TCC - 3'         |
| eIF4G2 L           | 5' – AGC GAG CCG GAG CTC TAT – 3'             |
| eIF4G2 R           | 5' – GGA GGG GAT GGT AGA AAT GAA – 3'         |
| eIF4G3 L           | 5' – AAG AAA ATC CGT CCG CAT C – 3'           |

|          |                                       |
|----------|---------------------------------------|
| eIF4G3 R | 5' – CTG ATT TCA GAG CCG GTT TC – 3'  |
| eIF4A L  | 5' – GGA TCA TGT CTG CGA GTC AG – 3'  |
| eIF4A R  | 5' – GCT ATC CAC AAT CTC GTT CCA – 3' |
| IRE1a L  | 5' – GCC GAA GTT CAG ATG GAA TC – 3'  |
| IRE1a R  | 5' – ATC AGC AAA GGC CGA TGA – 3'     |
